# Supplementary material for: Revealing the size effect of P-coated carbon-supported palladium nanoparticles in complete hydrodeoxygenation of bio-based aromatic alcohols
Source: Royal Society of Chemistry journal article supplement (doi:10.1039/d5dt02327k), 2025-12-17
Supplement: d5dt02327k1.pdf [file d5dt02327k1.pdf]

# **Revealing the Size Effect of P-Coated Carbon-Supported Palladium Nanoparticles in Complete Hydrodeoxygenation of Biobased Aromatic Alcohols**

Wei Xuemei<sup>a,b</sup>, Xu Haonan<sup>a,b</sup>, Fang Zhengwei<sup>a</sup>, Wang Kai<sup>a,b</sup>, Cai Tao<sup>a,b</sup>,  
Yu Guoqi<sup>a,b</sup>, Shen Hualiang<sup>a,b</sup>, Luo Yanjuan<sup>a,b</sup>, Yan Mingming<sup>c</sup>, Chen  
Jianhui<sup>a,b,\*</sup>, Shen Runpu<sup>a,b,\*</sup>

<sup>a</sup>*College of Chemistry and Chemical Engineering, Shaoxing University, Shaoxing, 312000, China*

<sup>b</sup>*Zhejiang Engineering Research Center of Fat-soluble Vitamin, Shaoxing University, Shaoxing, 312000, China*

<sup>c</sup>*College of Mechanical and Electrical Engineering, Shaoxing University, Shaoxing, 312000, China*

\* To whom correspondence should be addressed.

E-mail: chenjianhui@usx.edu.cn; srunpu@usx.edu.cn

Tel.: 0575-86024773

## **Text S\*. EXPERIMENTAL SECTION**

### **Text S1. Catalysts preparation**

#### **Text S1.1. Controllable preparation of 2-7 nm Pd nanoparticles**

**Preparation of AC-P matrix.** A controlled phosphoric acid activation process was performed by reflux-assisted polycondensation in 85 wt%  $\text{H}_3\text{PO}_4$  aqueous solution at  $343 \pm 1$  K for 4 h under  $\text{N}_2$  atmosphere (flow rate: 50 mL/min), during which phosphoric acid polymerizes on the surface of the carbon matrix. The viscous product was then transferred to a centrifuge (8000 rpm) for precisely 5 min, yielding a activated carbon precursor with homogeneous acid distribution, and named AC-P matrix.

**Controllable preparation of 2-7 nm Pd nanoparticles.** Pd nanoparticles with precisely controlled diameters (2.2-7.2 nm) were synthesized via a polyol reduction method with polyvinylpyrrolidone (PVP) as the stabilizing agent. In a standard procedure (4.7 nm), 40 mg of PVP (K29-32, average molecular weight 58000) was dissolved in 2 mL of ethylene glycol under vigorous stirring (800 rpm) in an oil bath preheated to 160 °C. After 10 min of thermal equilibration, 1 mL of  $\text{Na}_2\text{PdCl}_4$  ethylene glycol solution (16 mg/mL) was rapidly injected into the reaction mixture. The system was maintained at 160 °C for 1 h to ensure complete reduction of  $\text{Pd}^{2+}$  ions. The reaction was quenched by immediate immersion in an ice bath, followed by repeated washing with acetone and deionized water ( $5 \times 20$  ml each) until PVP residues were undetectable by TEM analysis. The purified Pd nanoparticles were redispersed in 10 mL of ethanol via 30 min ultrasonication (40 kHz, 100 W) to form a homogeneous colloidal suspension.

Particle size modulation was achieved by varying the PVP/Pd molar ratio and precursor concentration: 2.2 nm NPs: 1600 mg PVP (PVP/Pd = 120:1 molar ratio), 3.2 nm NPs: 200 mg PVP (PVP/Pd = 15:1) + 16 mg  $\text{Na}_2\text{PdCl}_4$ , 7.2 nm NPs: 200 mg PVP (PVP/Pd = 15:1) + 80 mg  $\text{Na}_2\text{PdCl}_4$  ( $5 \times$  precursor concentration).

#### **Text S2.2. Characterization Methods**

Powder X-ray diffraction (XRD) was performed using a Netherlands PANalytical Empyrean diffractometer equipped with Cu  $\text{K}\alpha$  radiation ( $\lambda = 1.54050$  Å).

Transmission electron microscopy (TEM) and high-resolution transmission electron microscopy (HRTEM) were conducted on a JEOL JEM-2100F microscope operated at an accelerating voltage of 200 kV. The Pd content was quantified by inductively coupled plasma optical emission spectrometry (ICP-OES). Nitrogen physisorption measurements were carried out at 77 K using a Micromeritics ASAP 2020 PLUS analyzer to determine the Brunauer-Emmett-Teller (BET) surface area and pore volume. X-ray photoelectron spectroscopy (XPS) was performed on a Thermo Scientific ESCALAB 250Xi system, with the C 1s peak of adventitious carbon (284.8 eV) serving as the reference for binding energy calibration. Fourier transform infrared (FTIR) spectroscopy analyses were conducted on a Nicolet Nexus 110W ( $\pm 5\text{V}/\pm 12\text{V}$ ) spectrometer. Prior to analysis, all samples were pretreated at 80 °C for 8 h, and measurements were taken using identical amounts of KBr and sample for consistency. For temperature-programmed reduction (TPR), 50 mg of the sample was pretreated at 100 °C under an Ar flow ( $27\text{ mL}\cdot\text{min}^{-1}$ ) for 1 h, followed by heating to 900 °C at a ramp rate of  $10\text{ }^{\circ}\text{C}\cdot\text{min}^{-1}$  in a 10 vol%  $\text{H}_2/\text{Ar}$  mixture ( $30\text{ mL}\cdot\text{min}^{-1}$ ,  $\text{H}_2:\text{Ar} = 1:9$ ). In situ diffuse reflectance infrared Fourier transform spectroscopy (DRIFTS) experiments were conducted on a Thermo Scientific IS50 spectrometer equipped with a CRCP-7070 in situ reaction cell. Approximately 10 mg of the catalyst was finely ground and diluted with KBr at a weight ratio of 1:100. The sample was pretreated under a He flow ( $30\text{ mL min}^{-1}$ ) at 80 °C for 1 h to remove adsorbed contaminants. After cooling to room temperature, a background spectrum was collected. The reactant was introduced via a micro-syringe injection of 20  $\mu\text{L}$  into a vaporizer maintained at 200 °C, carried by the He flow ( $30\text{ mL min}^{-1}$ ) over the catalyst bed. Spectra were recorded thereafter to monitor the surface species.

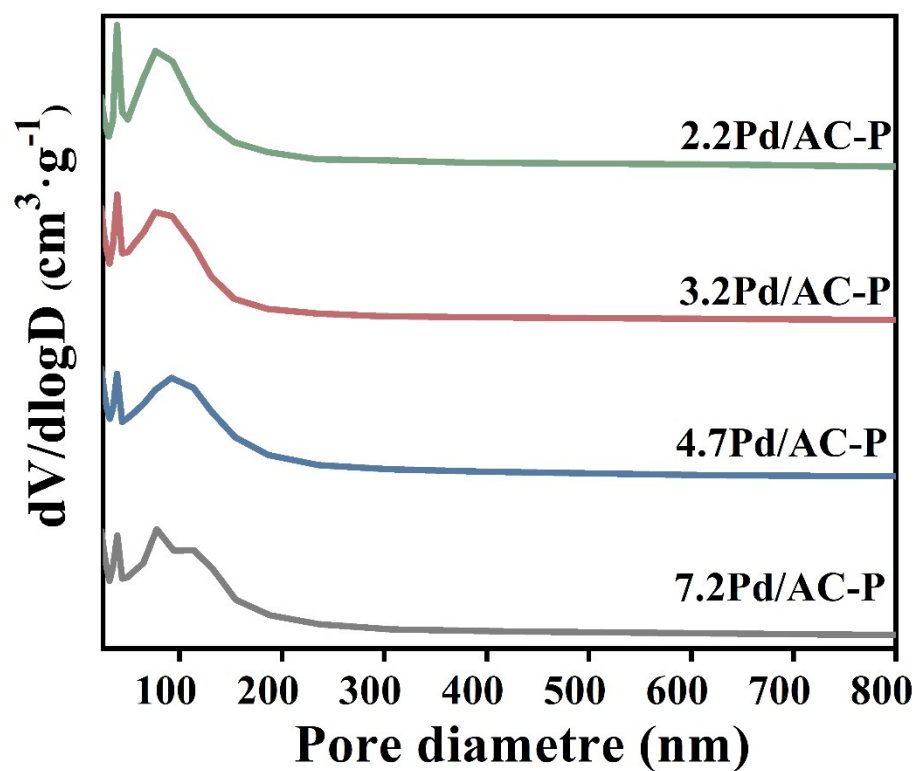

Figure S1 Brunauer-Emmett-Teller (BET) nitrogen sorption isotherms of  $x$ Pd/AC-P catalysts at 77 K.

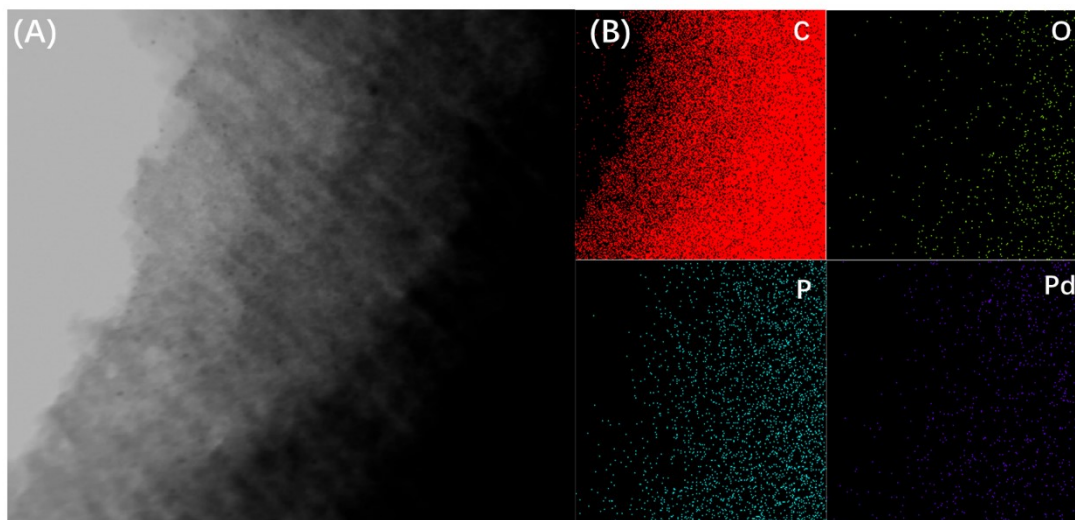

Figure S2 (A) TEM and (B) Mapping images of the C, O, P and Pd elements of 2.2Pd/AC-P catalyst.

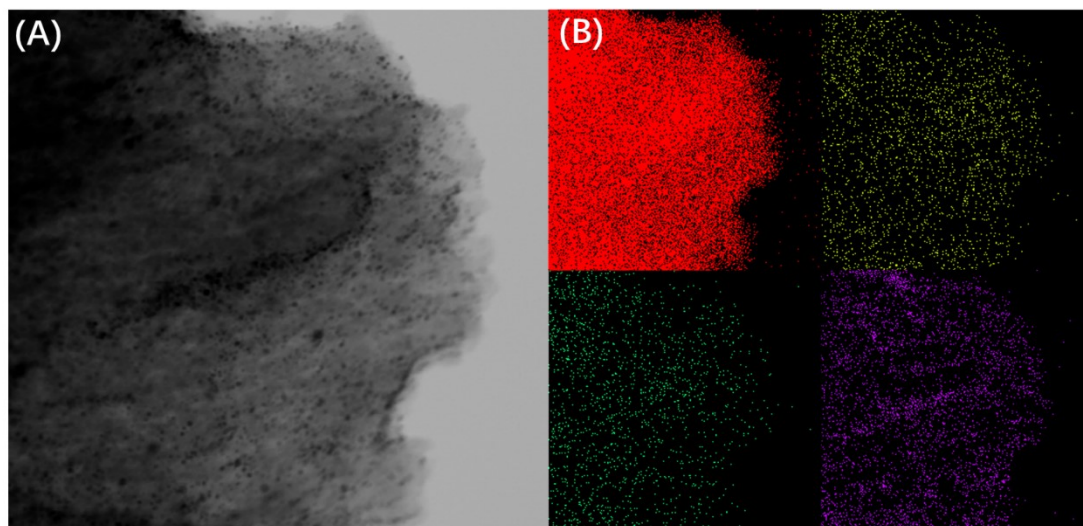

Figure S3 (A) TEM and (B) Mapping images of the C, O, P and Pd elements of 3.2Pd/AC-P catalyst.

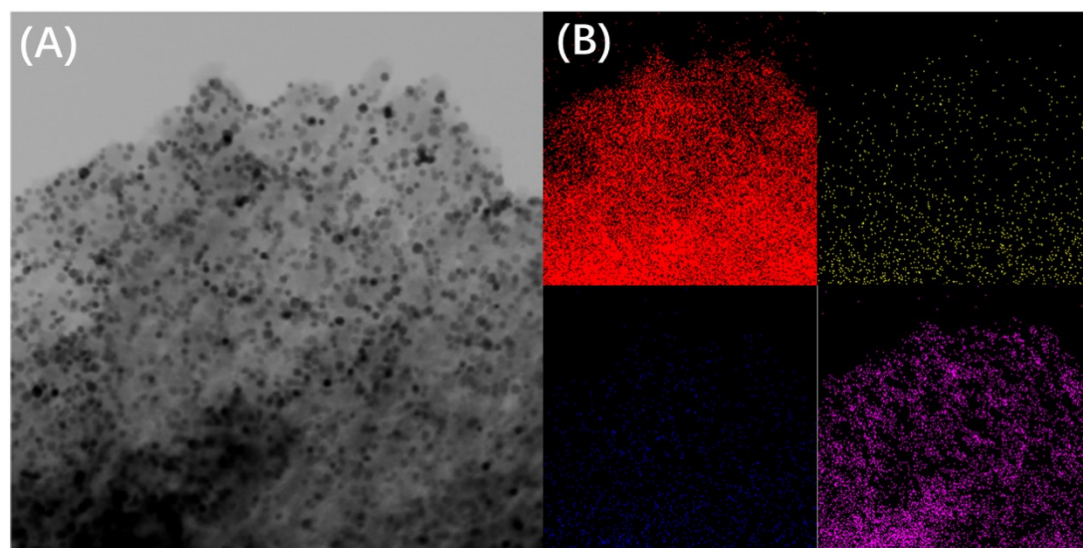

Figure S4 (A) TEM and (B) Mapping images of the C, O, P and Pd elements of 4.7Pd/AC-P catalyst.

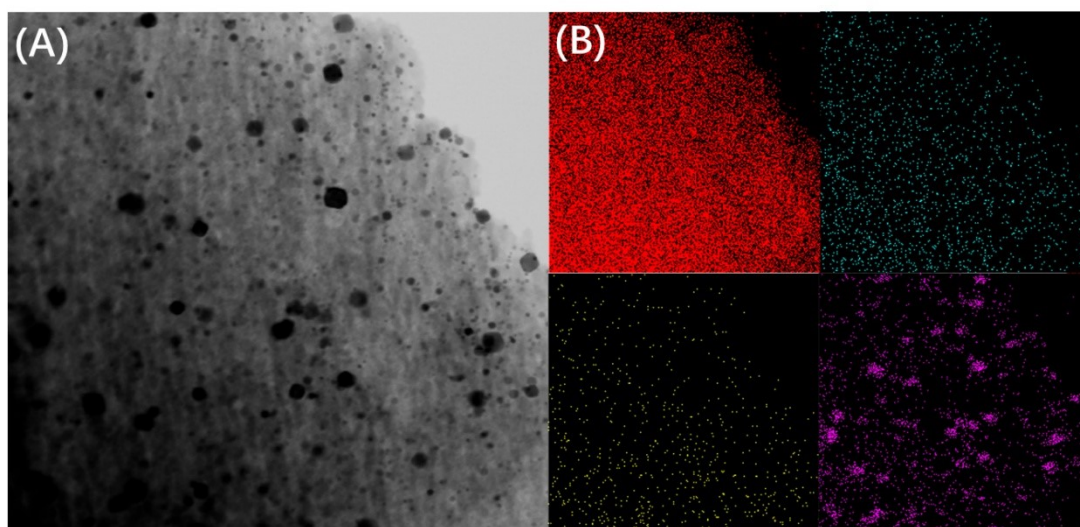

Figure S5 (A) TEM and (B) Mapping images of the C, O, P and Pd elements of 7.2Pd/AC-P catalyst.

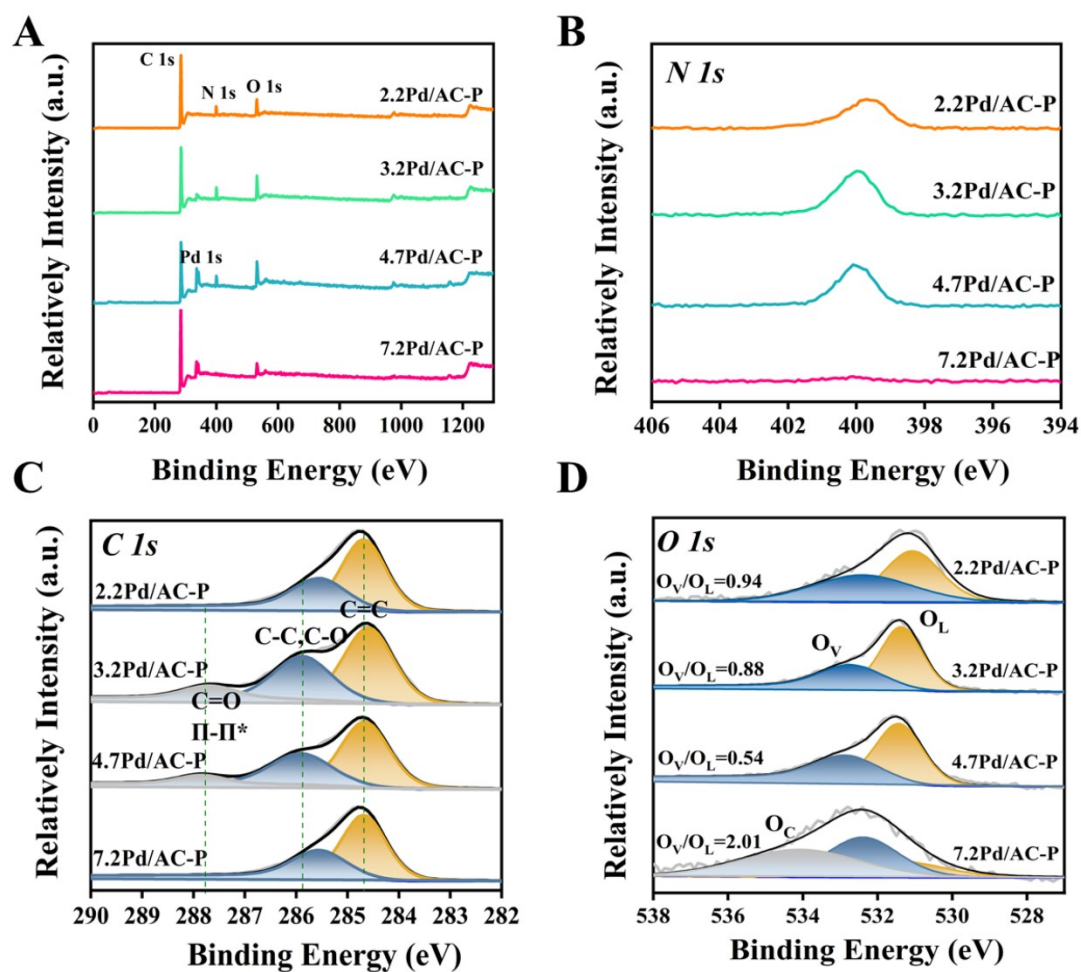

Figure S6 The full (a) and high resolution XPS spectra: (b) N 1s, (c) C 1s and (d) O 1s of the xPd/AC-P catalysts.



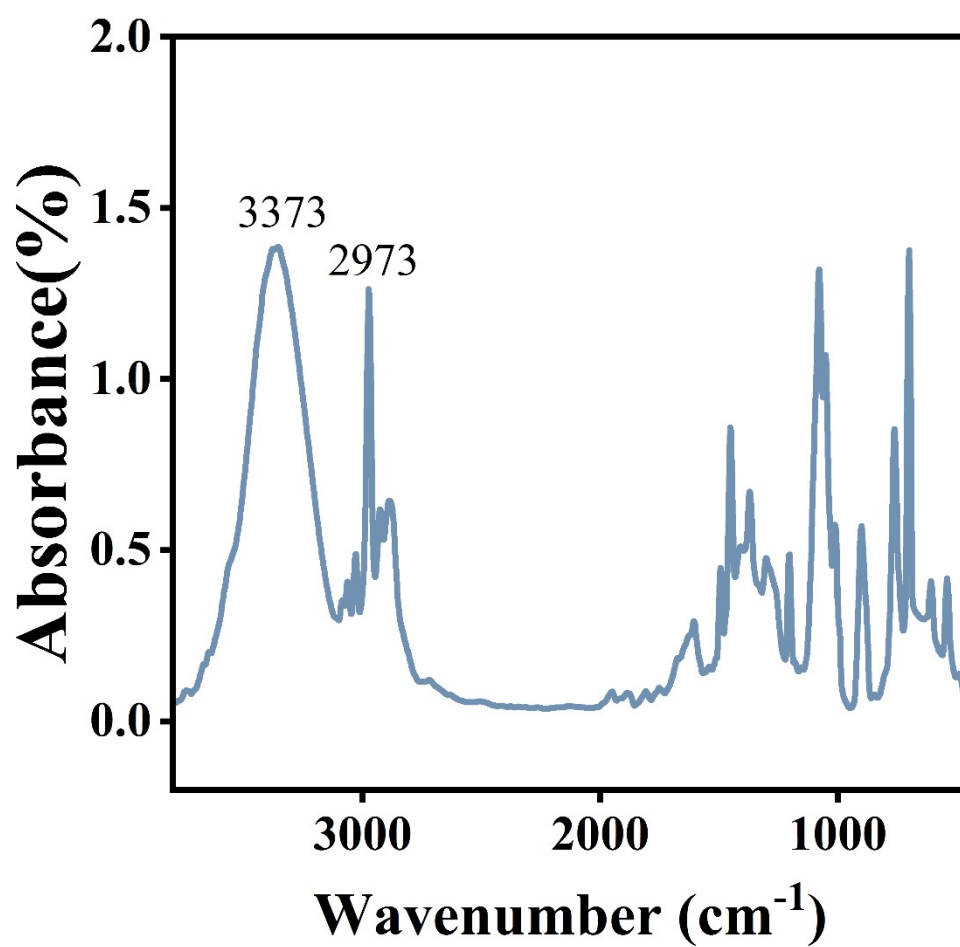

Figure S7 The IR spectra of PE.

| 1/T (*10 <sup>-3</sup> ) | 2.2Pd/AC-P               | 3.2Pd/AC-P               | 4.7Pd/AC-P                      | 7.2Pd/AC-P     |
|--------------------------|--------------------------|--------------------------|---------------------------------|----------------|
| 3.36                     |                          |                          |                                 | 8.0%, 120 min  |
| 3.19                     | 20.93%, 40 min,<br>-5.10 | 7.89%, 20 min<br>-5.49   | 27.47%, 90 min<br>-5.63         |                |
| 3.00                     | 25.01%, 10 min,<br>-3.55 | 4%, 10 min<br>-5.50      | 11.17%, 10 min<br>-2.18         | 13.42%, 10 min |
| 2.83                     |                          | 30.78%, 10 min,<br>-1.93 | 23.11%, 10 min<br>-3.63         | 42.67%, 20 min |
| 2.68                     |                          |                          | 46.83%, 5 min<br>35.92%, 20 min |                |
